# Supplementary material for: Safety and Pharmacokinetics of Single and Multiple Ascending Doses of the Novel Oral Human GLP-1 Analogue, Oral Semaglutide, in Healthy Subjects and Subjects with Type 2 Diabetes
Source: Springer Nature journal article supplement (doi:10.1007/s40262-018-0728-4), 2018-12-18
Supplement: MOESM1 [file 16350302]

# **Electronic supplementary material**

## **Clinical Pharmacokinetics**

### **Safety and pharmacokinetics of single and multiple ascending doses of the novel oral human GLP-1 analogue, oral semaglutide, in healthy subjects and subjects with type 2 diabetes**

Charlotte Granhall<sup>1</sup>, Morten Donsmark<sup>1</sup>, Thalia M. Blicher<sup>1</sup>, Georg Golor<sup>2</sup>, Flemming L. Søndergaard<sup>3</sup>, Mette Thomsen<sup>1</sup>, Tine A. Bækdal<sup>1</sup>

<sup>1</sup>Novo Nordisk A/S, Vandtårnsvej 114, DK-2860 Søborg, Denmark

<sup>2</sup>Early Phase Clinical Unit - Berlin, Parexel International GmbH, Klinikum Westend - Haus 18, Spandauer Damm 130, DE-14050 Berlin, Germany

<sup>3</sup>Novo Nordisk A/S, Alfred Nobels Vej 27, DK-9220 Aalborg Ø, Denmark

#### **Corresponding author:**

Tine A. Bækdal

E-mail: [tabq@novonordisk.com](mailto:tabq@novonordisk.com)

**Table S1** Pharmacokinetic blood sampling scheme (single-dose trial)

| Nominal time       | Semaglutide | SNAC |
|--------------------|-------------|------|
| 00:00 <sup>a</sup> | X           | X    |
| 00:15              | X           | X    |
| 00:30              | X           | X    |
| 01:00              | X           | X    |
| 01:30              | X           | X    |
| 02:00              | X           | X    |
| 02:30              | X           | X    |
| 03:00              | X           | X    |
| 03:30              | X           | X    |
| 04:00              | X           | X    |
| 04:30              | X           | X    |
| 05:00              | X           | X    |
| 05:30              | X           |      |
| 06:00              | X           |      |
| 07:00              | X           |      |
| 08:00              | X           |      |
| 10:00              | X           |      |
| 12:00              | X           |      |
| 16:00              | X           |      |
| 24:00              | X           |      |
| 36:00              | X           |      |
| 48:00              | X           |      |
| 60:00              | X           |      |
| 72:00              | X           |      |
| 84:00              | X           |      |
| 96:00              | X           |      |
| 108:00             | X           |      |
| 120:00             | X           |      |
| 144:00             | X           |      |
| 168:00             | X           |      |
| 264:00             | X           |      |
| 360:00             | X           |      |
| 504:00             | X           |      |

<sup>a</sup> Pre-dose.

SNAC, sodium N-(8-[2-hydroxybenzoyl] amino) caprylate.

**Table S2** Pharmacokinetic blood sampling scheme (multiple-dose trial)

| Day | Nominal time <sup>a</sup> | Semaglutide    | SNAC | Day | Nominal time <sup>a</sup> | Semaglutide | SNAC |
|-----|---------------------------|----------------|------|-----|---------------------------|-------------|------|
| 0   | 00:00 <sup>b</sup>        | X              | X    | 68  | 00:00 <sup>b</sup>        | X           | X    |
|     | 00:10                     |                | X    |     | 00:10                     |             | X    |
|     | 00:20                     |                | X    |     | 00:20                     |             | X    |
|     | 00:30                     |                | X    |     | 00:30                     | X           | X    |
|     | 00:40                     |                | X    |     | 00:40                     |             | X    |
|     | 00:50                     |                | X    |     | 00:50                     |             | X    |
|     | 01:00                     |                | X    |     | 01:00                     | X           | X    |
|     | 01:30                     |                | X    |     | 01:30                     |             | X    |
|     | 02:00                     |                | X    |     | 02:00                     | X           | X    |
|     | 02:30                     |                | X    |     | 02:30                     |             | X    |
|     | 03:00                     |                | X    |     | 03:00                     | X           | X    |
|     | 04:00                     |                | X    |     | 06:00                     | X           | X    |
|     | 06:00                     |                | X    |     | 12:00                     | X           |      |
| 7   | 00:00 <sup>b</sup>        | X <sup>c</sup> | X    | 69  | 00:00 <sup>b</sup>        | X           | X    |
| 14  | 00:00 <sup>b</sup>        | X <sup>c</sup> | X    |     | 00:10                     |             | X    |
| 21  | 00:00 <sup>b</sup>        | X <sup>c</sup> | X    |     | 00:20                     |             | X    |
| 28  | 00:00 <sup>b</sup>        | X <sup>c</sup> | X    |     | 00:30                     | X           | X    |
| 35  | 00:00 <sup>b</sup>        | X <sup>c</sup> | X    |     | 00:40                     |             | X    |
| 42  | 00:00 <sup>b</sup>        | X <sup>c</sup> | X    |     | 00:50                     |             | X    |
| 49  | 00:00 <sup>b</sup>        | X <sup>c</sup> | X    |     | 01:00                     | X           | X    |
| 56  | 00:00 <sup>b</sup>        | X <sup>c</sup> | X    |     | 01:30                     |             | X    |
| 63  | 00:00 <sup>b</sup>        | X <sup>c</sup> | X    |     | 02:00                     | X           | X    |
| 67  | 00:00 <sup>b</sup>        | X              | X    |     | 02:30                     |             | X    |
|     | 00:10                     |                | X    |     | 03:00                     | X           | X    |
|     | 00:20                     |                | X    |     | 06:00                     | X           | X    |
|     | 00:30                     | X              | X    |     | 12:00                     | X           |      |
|     | 00:40                     |                | X    |     | 24:00                     | X           | X    |
|     | 00:50                     |                | X    |     | 48:00                     | X           | X    |
|     | 01:00                     | X              | X    |     | 96:00                     | X           | X    |
|     | 01:30                     |                | X    |     | 168:00                    | X           | X    |
|     | 02:00                     | X              | X    |     | 240:00                    | X           | X    |
|     | 02:30                     |                | X    |     | 336:00                    | X           | X    |
|     | 03:00                     | X              | X    |     | 504:00 <sup>d</sup>       | X           | X    |
|     | 06:00                     | X              | X    |     |                           |             |      |
|     | 12:00                     | X              | X    |     |                           |             |      |

<sup>a</sup> Relative to dosing on the respective day; <sup>b</sup> Pre-dose; <sup>c</sup> An additional sample was taken at 1 hour post-dose; <sup>d</sup> This sample was taken between 504 and 840 hours after the last dose. SNAC, sodium N-(8-[2-hydroxybenzoyl] amino) caprylate.

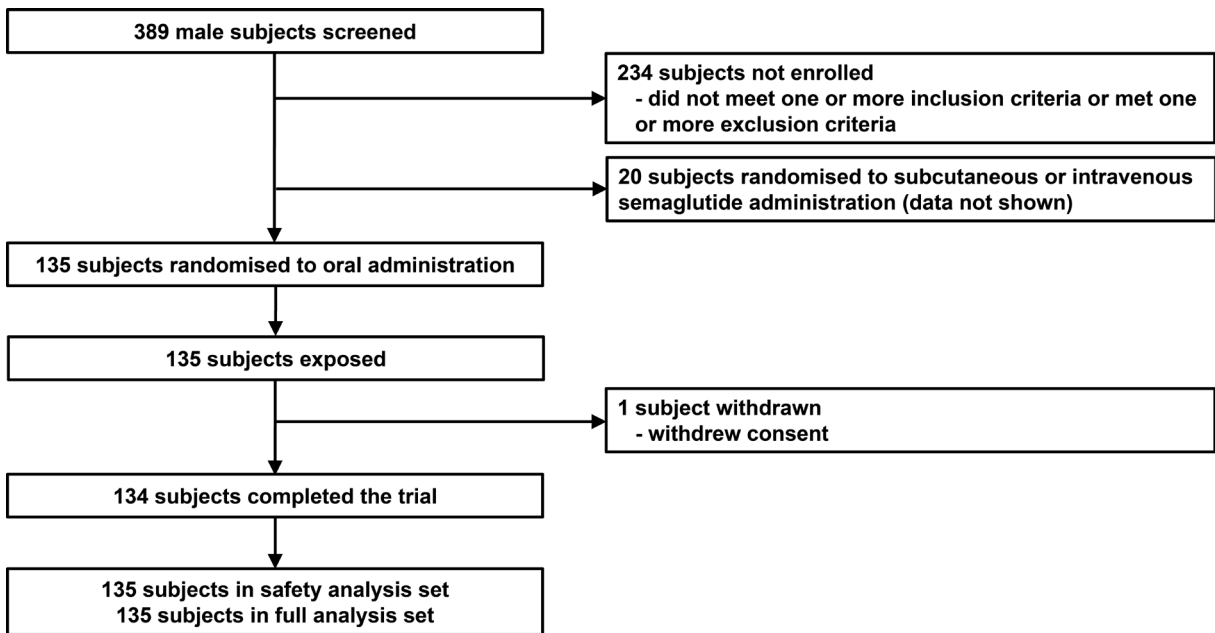

**Fig. S1** Subject disposition for the single-dose trial

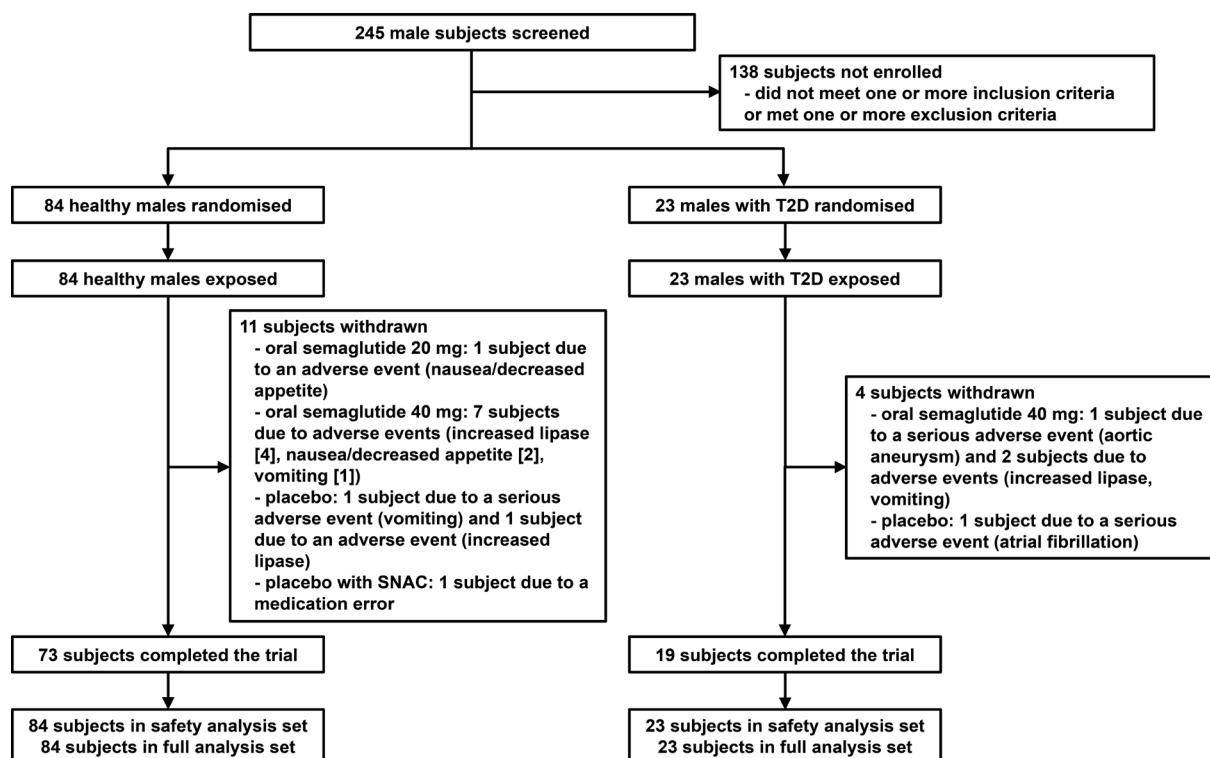

**Fig. S2** Subject disposition for the multiple-dose trial

T2D, type 2 diabetes.

**Table S3** Subject characteristics for each treatment arm in the single-dose trial

|                                  | 2 mg oral<br>semaglutide/<br>300 mg<br>SNAC<br>N=24 | 5 mg oral<br>semaglutide/<br>150 mg<br>SNAC<br>N=10 | 5 mg oral<br>semaglutide/<br>300 mg<br>SNAC<br>N=24 | 10 mg oral<br>semaglutide/<br>300 mg<br>SNAC<br>N=24 | 10 mg oral<br>semaglutide/<br>600 mg<br>SNAC<br>N=10 | 15 mg oral<br>semaglutide/<br>450 mg<br>SNAC<br>N=10 | 20 mg oral<br>semaglutide/<br>600 mg<br>SNAC<br>N=10 | Placebo with<br>SNAC <sup>a</sup><br>N=23 |
|----------------------------------|-----------------------------------------------------|-----------------------------------------------------|-----------------------------------------------------|------------------------------------------------------|------------------------------------------------------|------------------------------------------------------|------------------------------------------------------|-------------------------------------------|
| Age, years                       | 31.4 (8.6)                                          | 31.4 (4.4)                                          | 29.7 (9.0)                                          | 30.0 (8.6)                                           | 30.1 (8.8)                                           | 26.1 (4.7)                                           | 34.8 (8.2)                                           | 28.3 (6.8)                                |
| Sex                              |                                                     |                                                     |                                                     |                                                      |                                                      |                                                      |                                                      |                                           |
| Male, N (%)                      | 24 (100.0)                                          | 10 (100.0)                                          | 24 (100.0)                                          | 24 (100.0)                                           | 10 (100.0)                                           | 10 (100.0)                                           | 10 (100.0)                                           | 23 (100.0)                                |
| Race                             |                                                     |                                                     |                                                     |                                                      |                                                      |                                                      |                                                      |                                           |
| White, N (%)                     | 13 (54.2)                                           | 8 (80.0)                                            | 19 (79.2)                                           | 16 (66.7)                                            | 7 (70.0)                                             | 9 (90.0)                                             | 5 (50.0)                                             | 16 (69.6)                                 |
| Asian, N (%)                     | 4 (16.7)                                            | 1 (10.0)                                            | 2 (8.3)                                             | 4 (16.7)                                             | 0 (0.0)                                              | 0 (0.0)                                              | 2 (20.0)                                             | 3 (13.0)                                  |
| Black or African American, N (%) | 3 (12.5)                                            | 0 (0.0)                                             | 2 (8.3)                                             | 0 (0.0)                                              | 1 (10.0)                                             | 0 (0.0)                                              | 2 (20.0)                                             | 3 (13.0)                                  |
| Other, N (%)                     | 4 (16.7)                                            | 1 (10.0)                                            | 1 (4.2)                                             | 4 (16.7)                                             | 2 (20.0)                                             | 1 (10.0)                                             | 1 (10.0)                                             | 1 (4.3)                                   |
| Body weight, kg                  | 74.8 (6.5)                                          | 76.2 (7.2)                                          | 75.8 (8.2)                                          | 74.4 (6.6)                                           | 70.7 (3.7)                                           | 74.4 (6.7)                                           | 72.5 (9.8)                                           | 73.5 (6.6)                                |
| BMI, kg/m <sup>2</sup>           | 24.2 (1.8)                                          | 24.4 (1.3)                                          | 23.6 (2.1)                                          | 23.2 (2.3)                                           | 23.1 (2.2)                                           | 24.0 (1.9)                                           | 24.5 (2.0)                                           | 23.6 (2.4)                                |

<sup>a</sup> The different amounts of SNAC have been pooled.

Data are mean (standard deviation) unless otherwise stated.

BMI, body mass index; N, number of subjects; SNAC, sodium N-(8-[2-hydroxybenzoyl] amino) caprylate.

**Table S4** Subject characteristics for each treatment arm in the multiple-dose trial

|                                  | Healthy males          |                        |                      |                                | Males with T2D         |             |                   |
|----------------------------------|------------------------|------------------------|----------------------|--------------------------------|------------------------|-------------|-------------------|
|                                  | 20 mg oral semaglutide | 40 mg oral semaglutide | Placebo <sup>a</sup> | Placebo with SNAC <sup>b</sup> | 40 mg oral semaglutide | Placebo     | Placebo with SNAC |
|                                  | N=16                   | N=32                   | N=18                 | N=18                           | N=11                   | N=6         | N=6               |
| Age, years                       | 49.4 (9.5)             | 40.8 (10.7)            | 46.4 (14.5)          | 45.7 (10.5)                    | 55.3 (8.1)             | 55.5 (11.3) | 52.2 (6.1)        |
| Sex                              |                        |                        |                      |                                |                        |             |                   |
| Male, N (%)                      | 16 (100.0)             | 32 (100.0)             | 18 (100.0)           | 18 (100.0)                     | 11 (100.0)             | 6 (100.0)   | 6 (100.0)         |
| Race                             |                        |                        |                      |                                |                        |             |                   |
| White, N (%)                     | 16 (100.0)             | 30 (93.8)              | 18 (100.0)           | 18 (100.0)                     | 10 (90.9)              | 6 (100.0)   | 6 (100.0)         |
| Black or African American, N (%) | 0 (0.0)                | 1 (3.1)                | 0 (0.0)              | 0 (0.0)                        | 1 (9.1)                | 0 (0.0)     | 0 (0.0)           |
| Other, N (%)                     | 0 (0.0)                | 1 (3.1)                | 0 (0.0)              | 0 (0.0)                        | 0 (0.0)                | 0 (0.0)     | 0 (0.0)           |
| Body weight, kg                  | 84.2 (12.2)            | 83.9 (9.4)             | 83.6 (8.6)           | 81.9 (11.9)                    | 92.4 (11.0)            | 97.9 (17.3) | 96.7 (16.7)       |
| BMI, kg/m <sup>2</sup>           | 26.1 (2.7)             | 25.5 (2.5)             | 26.5 (1.9)           | 25.8 (2.6)                     | 29.8 (2.4)             | 29.4 (4.2)  | 28.7 (3.9)        |
| Duration of diabetes, years      | NA                     | NA                     | NA                   | NA                             | 6.2 (3.6)              | 6.9 (2.4)   | 3.4 (2.5)         |
| HbA <sub>1c</sub> , %            | NA                     | NA                     | NA                   | NA                             | 7.5 (0.7)              | 7.6 (0.9)   | 7.4 (0.6)         |

<sup>a</sup> The two placebo groups for healthy subjects have been pooled; <sup>b</sup> The two placebo with SNAC groups for healthy subjects have been pooled.

Data are mean (standard deviation) unless otherwise stated.

BMI, body mass index; HbA<sub>1c</sub>, glycosylated haemoglobin; N, number of subjects; NA, not applicable; SNAC, sodium N-(8-[2-hydroxybenzoyl] amino) caprylate; T2D, type 2 diabetes.

**Table S5** Summary of treatment-emergent adverse events after a single dose of oral semaglutide or placebo with SNAC in healthy male subjects (single-dose trial)

|                               | 2 mg oral semaglutide/<br>300 mg SNAC |     |   | 5 mg oral semaglutide/<br>150 mg SNAC |     |   | 5 mg oral semaglutide/<br>300 mg SNAC |     |   | 10 mg oral semaglutide/<br>300 mg SNAC |     |   | 10 mg oral semaglutide/<br>600 mg SNAC |     |   | 15 mg oral semaglutide/<br>450 mg SNAC |     |   | 20 mg oral semaglutide/<br>600 mg SNAC |     |   | Placebo with SNAC <sup>a</sup> |     |   |
|-------------------------------|---------------------------------------|-----|---|---------------------------------------|-----|---|---------------------------------------|-----|---|----------------------------------------|-----|---|----------------------------------------|-----|---|----------------------------------------|-----|---|----------------------------------------|-----|---|--------------------------------|-----|---|
|                               | N                                     | (%) | E | N                                     | (%) | E | N                                     | (%) | E | N                                      | (%) | E | N                                      | (%) | E | N                                      | (%) | E | N                                      | (%) | E | N                              | (%) | E |
| Total number of subjects      | 24                                    |     |   | 10                                    |     |   | 24                                    |     |   | 24                                     |     |   | 10                                     |     |   | 10                                     |     |   | 10                                     |     |   | 23                             |     |   |
| Adverse events                | 10 ( 41.7)                            | 21  |   | 5 ( 50.0)                             | 6   |   | 10 ( 41.7)                            | 16  |   | 12 ( 50.0)                             | 28  |   | 5 ( 50.0)                              | 9   |   | 2 ( 20.0)                              | 3   |   | 5 ( 50.0)                              | 10  |   | 6 ( 26.1)                      | 11  |   |
| Serious adverse events        | 0 ( 0.0)                              | 0   |   | 0 ( 0.0)                              | 0   |   | 0 ( 0.0)                              | 0   |   | 0 ( 0.0)                               | 0   |   | 0 ( 0.0)                               | 0   |   | 0 ( 0.0)                               | 0   |   | 0 ( 0.0)                               | 0   |   | 0 ( 0.0)                       | 0   |   |
| Severity                      |                                       |     |   |                                       |     |   |                                       |     |   |                                        |     |   |                                        |     |   |                                        |     |   |                                        |     |   |                                |     |   |
| Severe                        | 0 ( 0.0)                              | 0   |   | 0 ( 0.0)                              | 0   |   | 0 ( 0.0)                              | 0   |   | 0 ( 0.0)                               | 0   |   | 0 ( 0.0)                               | 0   |   | 0 ( 0.0)                               | 0   |   | 0 ( 0.0)                               | 0   |   | 0 ( 0.0)                       | 0   |   |
| Moderate                      | 1 ( 4.2)                              | 1   |   | 0 ( 0.0)                              | 0   |   | 2 ( 8.3)                              | 2   |   | 2 ( 8.3)                               | 2   |   | 0 ( 0.0)                               | 0   |   | 0 ( 0.0)                               | 0   |   | 0 ( 0.0)                               | 0   |   | 0 ( 0.0)                       | 0   |   |
| Mild                          | 10 ( 41.7)                            | 20  |   | 5 ( 50.0)                             | 6   |   | 8 ( 33.3)                             | 14  |   | 12 ( 50.0)                             | 26  |   | 5 ( 50.0)                              | 9   |   | 2 ( 20.0)                              | 3   |   | 5 ( 50.0)                              | 10  |   | 6 ( 26.1)                      | 11  |   |
| Relationship to trial product |                                       |     |   |                                       |     |   |                                       |     |   |                                        |     |   |                                        |     |   |                                        |     |   |                                        |     |   |                                |     |   |
| Probable                      | 0 ( 0.0)                              | 0   |   | 0 ( 0.0)                              | 0   |   | 0 ( 0.0)                              | 0   |   | 0 ( 0.0)                               | 0   |   | 0 ( 0.0)                               | 0   |   | 0 ( 0.0)                               | 0   |   | 0 ( 0.0)                               | 0   |   | 0 ( 0.0)                       | 0   |   |
| Possible                      | 3 ( 12.5)                             | 9   |   | 2 ( 20.0)                             | 2   |   | 5 ( 20.8)                             | 8   |   | 9 ( 37.5)                              | 17  |   | 4 ( 40.0)                              | 5   |   | 1 ( 10.0)                              | 1   |   | 3 ( 30.0)                              | 3   |   | 4 ( 17.4)                      | 6   |   |
| Unlikely                      | 10 ( 41.7)                            | 12  |   | 4 ( 40.0)                             | 4   |   | 5 ( 20.8)                             | 8   |   | 9 ( 37.5)                              | 11  |   | 2 ( 20.0)                              | 4   |   | 1 ( 10.0)                              | 2   |   | 4 ( 40.0)                              | 7   |   | 3 ( 13.0)                      | 5   |   |
| Outcome                       |                                       |     |   |                                       |     |   |                                       |     |   |                                        |     |   |                                        |     |   |                                        |     |   |                                        |     |   |                                |     |   |
| Not recovered                 | 0 ( 0.0)                              | 0   |   | 0 ( 0.0)                              | 0   |   | 0 ( 0.0)                              | 0   |   | 0 ( 0.0)                               | 0   |   | 0 ( 0.0)                               | 0   |   | 0 ( 0.0)                               | 0   |   | 0 ( 0.0)                               | 0   |   | 0 ( 0.0)                       | 0   |   |
| Recovering                    | 0 ( 0.0)                              | 0   |   | 0 ( 0.0)                              | 0   |   | 0 ( 0.0)                              | 0   |   | 0 ( 0.0)                               | 0   |   | 0 ( 0.0)                               | 0   |   | 0 ( 0.0)                               | 0   |   | 0 ( 0.0)                               | 0   |   | 0 ( 0.0)                       | 0   |   |
| Recovered                     | 10 ( 41.7)                            | 21  |   | 5 ( 50.0)                             | 6   |   | 10 ( 41.7)                            | 16  |   | 12 ( 50.0)                             | 28  |   | 5 ( 50.0)                              | 9   |   | 2 ( 20.0)                              | 3   |   | 5 ( 50.0)                              | 10  |   | 6 ( 26.1)                      | 11  |   |

<sup>a</sup> The different amounts of SNAC have been pooled.

E, number of adverse events; N, number of subjects with at least one adverse event; %, percentage of subjects with at least one adverse event; SNAC, sodium N-(8-[2-hydroxybenzoyl] amino) caprylate.



**Table S6** Summary of  $AUC_{0-5h,SNAC,SD}$ ,  $C_{max,SNAC,SD}$  and  $t_{max,SNAC,SD}$  after a single dose of oral semaglutide in healthy male subjects (single-dose trial)

|                                | 5 mg oral<br>semaglutide/<br>150 mg SNAC<br>N=10 | 2 mg oral<br>semaglutide/<br>300 mg SNAC<br>N=24 | 5 mg oral<br>semaglutide/<br>300 mg SNAC<br>N=24 | 10 mg oral<br>semaglutide/<br>300 mg SNAC<br>N=24 | 15 mg oral<br>semaglutide/<br>450 mg SNAC<br>N=10 | 10 mg oral<br>semaglutide/<br>600 mg SNAC<br>N=10 | 20 mg oral<br>semaglutide/<br>600 mg SNAC<br>N=10 |
|--------------------------------|--------------------------------------------------|--------------------------------------------------|--------------------------------------------------|---------------------------------------------------|---------------------------------------------------|---------------------------------------------------|---------------------------------------------------|
| $AUC_{0-5h,SNAC,SD}$ (ng·h/mL) |                                                  |                                                  |                                                  |                                                   |                                                   |                                                   |                                                   |
| Geometric mean                 | 383.5                                            | 968.3                                            | 794.5                                            | 743.0                                             | 1360.6                                            | 1520.0                                            | 1821.0                                            |
| CV%                            | 30.8                                             | 26.2                                             | 34.5                                             | 30.7                                              | 25.1                                              | 51.1                                              | 28.4                                              |
| Min-Max                        | 162.2-604.8                                      | 599.2-1660.6                                     | 296.0-1537.1                                     | 300.8-1235.2                                      | 700.2-2029.8                                      | 761.7-3440.4                                      | 756.5-2567.6                                      |
| $C_{max,SNAC,SD}$ (ng/mL)      |                                                  |                                                  |                                                  |                                                   |                                                   |                                                   |                                                   |
| Geometric mean                 | 432.2                                            | 870.9                                            | 760.9                                            | 724.1                                             | 938.7                                             | 1323.4                                            | 1673.2                                            |
| CV%                            | 61.5                                             | 46.9                                             | 67.0                                             | 49.8                                              | 51.9                                              | 88.0                                              | 49.7                                              |
| Min-Max                        | 105-1190                                         | 276-1988                                         | 197-3012                                         | 211-1729                                          | 505-1947                                          | 441-5367                                          | 469-3488                                          |
| $t_{max,SNAC,SD}$ (hours)      |                                                  |                                                  |                                                  |                                                   |                                                   |                                                   |                                                   |
| Median                         | 0.38                                             | 0.50                                             | 0.50                                             | 0.38                                              | 0.75                                              | 0.50                                              | 0.50                                              |
| Min - Max                      | 0.25-3.00                                        | 0.25-5.00                                        | 0.25-3.50                                        | 0.25-5.00                                         | 0.25-2.50                                         | 0.25-1.00                                         | 0.25-1.00                                         |

$AUC$ , area under the curve;  $C_{max}$ , maximum concentration; CV%, coefficient of variation in %; Max, maximum; Min, minimum; SD, single dose; SNAC, sodium N-(8-[2-hydroxybenzoyl] amino) caprylate;  $t_{max}$ , time to maximum concentration.

**Table S7** Summary of the most frequently reported treatment-emergent adverse events per system organ class and preferred term during 10 weeks of once-daily dosing of oral semaglutide, placebo or placebo with SNAC in healthy males and in males with T2D (multiple-dose trial)

| System organ class<br>Preferred term | Healthy males          |     |    |                        |     |     |                      |     |    | Males with T2D                 |     |    |                        |     |    |           |     |   |                   |     |   |
|--------------------------------------|------------------------|-----|----|------------------------|-----|-----|----------------------|-----|----|--------------------------------|-----|----|------------------------|-----|----|-----------|-----|---|-------------------|-----|---|
|                                      | 20 mg oral semaglutide |     |    | 40 mg oral semaglutide |     |     | Placebo <sup>a</sup> |     |    | Placebo with SNAC <sup>b</sup> |     |    | 40 mg oral semaglutide |     |    | Placebo   |     |   | Placebo with SNAC |     |   |
|                                      | N                      | (%) | E  | N                      | (%) | E   | N                    | (%) | E  | N                              | (%) | E  | N                      | (%) | E  | N         | (%) | E | N                 | (%) | E |
| Total number of subjects             | 16                     |     |    | 32                     |     |     | 18                   |     |    | 18                             |     |    | 11                     |     |    | 6         |     |   | 6                 |     |   |
| Gastrointestinal disorders           | 8 ( 50.0)              |     | 70 | 27 ( 84.4)             |     | 148 | 5 ( 27.8)            |     | 14 | 13 ( 72.2)                     |     | 46 | 8 ( 72.7)              |     | 42 | 3 ( 50.0) |     | 5 | 2 ( 33.3)         |     | 3 |
| Nausea                               | 7 ( 43.8)              |     | 8  | 15 ( 46.9)             |     | 25  | 3 ( 16.7)            |     | 4  | 4 ( 22.2)                      |     | 7  | 6 ( 54.5)              |     | 7  | 0 ( 0.0)  |     | 0 | 0 ( 0.0)          |     | 0 |
| Vomiting                             | 5 ( 31.3)              |     | 17 | 13 ( 40.6)             |     | 20  | 2 ( 11.1)            |     | 2  | 1 ( 5.6)                       |     | 1  | 5 ( 45.5)              |     | 11 | 0 ( 0.0)  |     | 0 | 0 ( 0.0)          |     | 0 |
| Eructation                           | 2 ( 12.5)              |     | 7  | 14 ( 43.8)             |     | 27  | 0 ( 0.0)             |     | 0  | 1 ( 5.6)                       |     | 2  | 3 ( 27.3)              |     | 4  | 0 ( 0.0)  |     | 0 | 0 ( 0.0)          |     | 0 |
| Abdominal pain                       | 3 ( 18.8)              |     | 9  | 9 ( 28.1)              |     | 14  | 2 ( 11.1)            |     | 3  | 5 ( 27.8)                      |     | 12 | 0 ( 0.0)               |     | 0  | 0 ( 0.0)  |     | 0 | 0 ( 0.0)          |     | 0 |
| Diarrhoea                            | 5 ( 31.3)              |     | 11 | 4 ( 12.5)              |     | 8   | 1 ( 5.6)             |     | 1  | 3 ( 16.7)                      |     | 4  | 2 ( 18.2)              |     | 2  | 1 ( 16.7) |     | 2 | 2 ( 33.3)         |     | 3 |
| Abdominal distention                 | 3 ( 18.8)              |     | 3  | 7 ( 21.9)              |     | 9   | 1 ( 5.6)             |     | 2  | 4 ( 22.2)                      |     | 6  | 1 ( 9.1)               |     | 1  | 0 ( 0.0)  |     | 0 | 0 ( 0.0)          |     | 0 |
| Dyspepsia                            | 1 ( 6.3)               |     | 2  | 10 ( 31.3)             |     | 13  | 0 ( 0.0)             |     | 0  | 1 ( 5.6)                       |     | 2  | 4 ( 36.4)              |     | 8  | 0 ( 0.0)  |     | 0 | 0 ( 0.0)          |     | 0 |
| Abdominal discomfort                 | 2 ( 12.5)              |     | 4  | 5 ( 15.6)              |     | 5   | 0 ( 0.0)             |     | 0  | 2 ( 11.1)                      |     | 2  | 3 ( 27.3)              |     | 3  | 0 ( 0.0)  |     | 0 | 0 ( 0.0)          |     | 0 |
| Flatulence                           | 1 ( 6.3)               |     | 7  | 4 ( 12.5)              |     | 6   | 0 ( 0.0)             |     | 0  | 3 ( 16.7)                      |     | 6  | 1 ( 9.1)               |     | 1  | 1 ( 16.7) |     | 2 | 0 ( 0.0)          |     | 0 |
| Abdominal pain upper                 | 1 ( 6.3)               |     | 1  | 3 ( 9.4)               |     | 6   | 1 ( 5.6)             |     | 1  | 0 ( 0.0)                       |     | 0  | 1 ( 9.1)               |     | 1  | 0 ( 0.0)  |     | 0 | 0 ( 0.0)          |     | 0 |
| Infrequent bowel movements           | 0 ( 0.0)               |     | 0  | 3 ( 9.4)               |     | 5   | 1 ( 5.6)             |     | 1  | 2 ( 11.1)                      |     | 2  | 0 ( 0.0)               |     | 0  | 0 ( 0.0)  |     | 0 | 0 ( 0.0)          |     | 0 |
| Toothache                            | 0 ( 0.0)               |     | 0  | 4 ( 12.5)              |     | 4   | 0 ( 0.0)             |     | 0  | 1 ( 5.6)                       |     | 1  | 0 ( 0.0)               |     | 0  | 1 ( 16.7) |     | 1 | 0 ( 0.0)          |     | 0 |
| Metabolism and nutrition disorders   | 10 ( 62.5)             |     | 12 | 25 ( 78.1)             |     | 33  | 2 ( 11.1)            |     | 3  | 4 ( 22.2)                      |     | 7  | 10 ( 90.9)             |     | 10 | 0 ( 0.0)  |     | 0 | 2 ( 33.3)         |     | 2 |
| Decreased appetite                   | 10 ( 62.5)             |     | 12 | 25 ( 78.1)             |     | 33  | 2 ( 11.1)            |     | 3  | 3 ( 16.7)                      |     | 6  | 10 ( 90.9)             |     | 10 | 0 ( 0.0)  |     | 0 | 2 ( 33.3)         |     | 2 |
| Infections and infestations          | 2 ( 12.5)              |     | 2  | 12 ( 37.5)             |     | 16  | 9 ( 50.0)            |     | 11 | 8 ( 44.4)                      |     | 13 | 2 ( 18.2)              |     | 3  | 3 ( 50.0) |     | 3 | 3 ( 50.0)         |     | 3 |
| Nasopharyngitis                      | 2 ( 12.5)              |     | 2  | 10 ( 31.3)             |     | 13  | 8 ( 44.4)            |     | 8  | 8 ( 44.4)                      |     | 9  | 2 ( 18.2)              |     | 3  | 3 ( 50.0) |     | 3 | 3 ( 50.0)         |     | 3 |
| Nervous system disorders             | 5 ( 31.3)              |     | 18 | 14 ( 43.8)             |     | 34  | 5 ( 27.8)            |     | 8  | 6 ( 33.3)                      |     | 17 | 5 ( 45.5)              |     | 8  | 1 ( 16.7) |     | 1 | 1 ( 16.7)         |     | 1 |

|                                                      |           |    |            |    |           |   |           |    |           |   |           |   |           |   |
|------------------------------------------------------|-----------|----|------------|----|-----------|---|-----------|----|-----------|---|-----------|---|-----------|---|
| Headache                                             | 5 ( 31.3) | 16 | 12 ( 37.5) | 24 | 5 ( 27.8) | 8 | 6 ( 33.3) | 17 | 4 ( 36.4) | 7 | 0 ( 0.0)  | 0 | 1 ( 16.7) | 1 |
| General disorders and administration site conditions | 6 ( 37.5) | 10 | 10 ( 31.3) | 18 | 2 ( 11.1) | 2 | 5 ( 27.8) | 9  | 3 ( 27.3) | 4 | 1 ( 16.7) | 1 | 2 ( 33.3) | 2 |
| Fatigue                                              | 4 ( 25.0) | 5  | 8 ( 25.0)  | 10 | 1 ( 5.6)  | 1 | 3 ( 16.7) | 7  | 2 ( 18.2) | 3 | 1 ( 16.7) | 1 | 1 ( 16.7) | 1 |
| Asthenia                                             | 3 ( 18.8) | 4  | 3 ( 9.4)   | 4  | 0 ( 0.0)  | 0 | 0 ( 0.0)  | 0  | 0 ( 0.0)  | 0 | 0 ( 0.0)  | 0 | 0 ( 0.0)  | 0 |
| Investigations                                       | 0 ( 0.0)  | 0  | 7 ( 21.9)  | 8  | 1 ( 5.6)  | 1 | 0 ( 0.0)  | 0  | 1 ( 9.1)  | 1 | 1 ( 16.7) | 1 | 0 ( 0.0)  | 0 |
| Lipase increased                                     | 0 ( 0.0)  | 0  | 7 ( 21.9)  | 7  | 1 ( 5.6)  | 1 | 0 ( 0.0)  | 0  | 1 ( 9.1)  | 1 | 1 ( 16.7) | 1 | 0 ( 0.0)  | 0 |

Only preferred terms with an overall frequency  $\geq 5.0\%$  are included.

<sup>a</sup> The two placebo groups for healthy subjects have been pooled.

<sup>b</sup> The two placebo with SNAC groups for healthy subjects have been pooled.

E, number of adverse events; N, number of subjects with at least one adverse event; %, percentage of subjects with at least one adverse event; SNAC, sodium N-(8-[2-hydroxybenzoyl] amino) caprylate; T2D, type 2 diabetes.

**Table S8** Within-subject day-to-day variability and total variability in $AUC_{0-24h, \text{semaglutide, SS}}$  and  $C_{\text{max, semaglutide, SS}}$  in healthy males and in males with T2D

(multiple-dose trial)

|                                       | Healthy males                  |                                | Males with T2D                 |
|---------------------------------------|--------------------------------|--------------------------------|--------------------------------|
|                                       | 20 mg oral semaglutide<br>N=16 | 40 mg oral semaglutide<br>N=32 | 40 mg oral semaglutide<br>N=11 |
| $AUC_{0-24h, \text{semaglutide, SS}}$ |                                |                                |                                |
| Within-subject day-to-day variability | 19.7 [15.7;26.5]               | 32.6 [27.0;41.1]               | 25.3 [18.7;39.4]               |
| Total variability                     | 72.7 [51.9;126.4]              | 84.4 [64.5;124.6]              | 65.0 [43.4;138.4]              |
| $C_{\text{max, semaglutide, SS}}$     |                                |                                |                                |
| Within-subject day-to-day variability | 24.1 [19.2;32.6]               | 34.9 [29.0;44.1]               | 31.0 [22.8;48.6]               |
| Total variability                     | 71.5 [51.6;121.0]              | 83.1 [64.0;121.1]              | 63.6 [43.5;125.4]              |

Data are estimated CV% and the 95% CI of the CV. Total variability consists of both the within-subject day-to-day variability and the between-subject variability.

AUC, area under the curve; CI, confidence interval;  $C_{\text{max}}$ , maximum concentration; CV%, coefficient of variation in %; N, number of subjects; %, percentage of subjects; SS, steady state; T2D, type 2 diabetes.

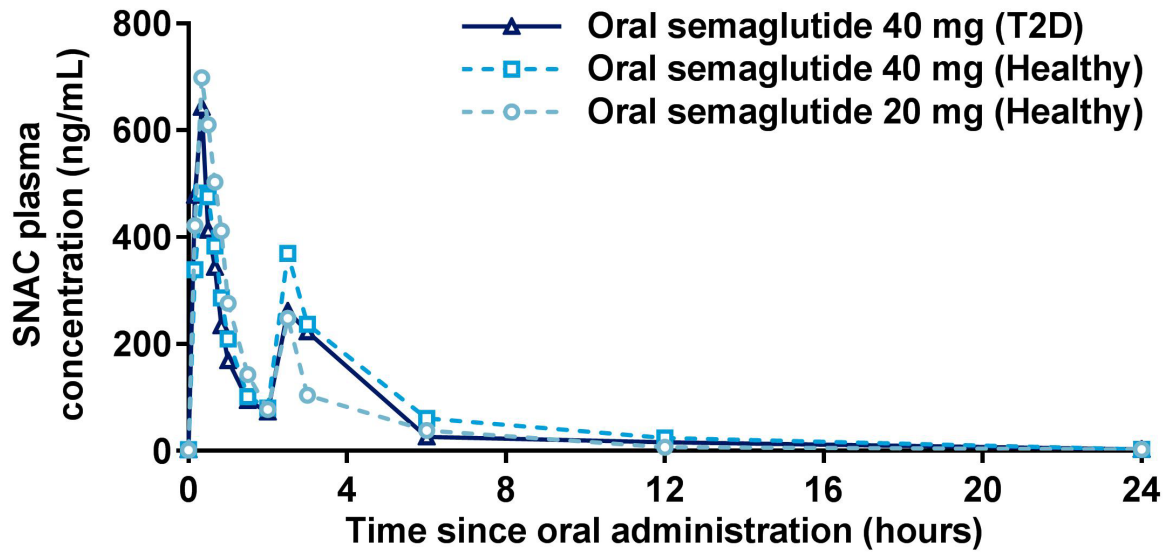

**Fig. S3** Arithmetic mean SNAC plasma concentration-time profiles at steady state of oral semaglutide in healthy males and in males with T2D (multiple-dose trial)

Profiles represent arithmetic means of the last 3 days of once-daily oral semaglutide treatment for 10 weeks. T2D, type 2 diabetes.

**Table S9** Summary of  $AUC_{0-24h,SNAC,SS}$ ,  $C_{max,SNAC,SS}$  and  $t_{max,SNAC,SS}$  for oral semaglutide in healthy males and in males with T2D (multiple-dose trial)

|                                 | Healthy males<br>20 mg oral<br>semaglutide<br>N=16 | Healthy males<br>40 mg oral<br>semaglutide<br>N=32 | Males with T2D<br>20 mg oral<br>semaglutide<br>N=11 |
|---------------------------------|----------------------------------------------------|----------------------------------------------------|-----------------------------------------------------|
| $AUC_{0-24h,SNAC,SS}$ (ng·h/mL) |                                                    |                                                    |                                                     |
| Geometric mean                  | 1382.7                                             | 1636.3                                             | 1206.2                                              |
| CV%                             | 32.8                                               | 54.1                                               | 53.8                                                |
| Min-Max                         | 827.5-2861.5                                       | 938.9-5554.4                                       | 722.0-3528.5                                        |
| $C_{max,SNAC,SS}$ (ng/mL)       |                                                    |                                                    |                                                     |
| Geometric mean                  | 657.9                                              | 606.6                                              | 578.8                                               |
| CV%                             | 86.1                                               | 79.0                                               | 191.3                                               |
| Min-Max                         | 161-1915                                           | 200-2236                                           | 76-4159                                             |
| $t_{max,SNAC,SS}$ (hours)       |                                                    |                                                    |                                                     |
| Median                          | 0.50                                               | 0.50                                               | 1.43                                                |
| Min-Max                         | 0.2-2.5                                            | 0.2-6.0                                            | 0.2-3.0                                             |

Data are from the last day of once-daily oral semaglutide treatment for 10 weeks.

AUC, area under the curve;  $C_{max}$ , maximum concentration; CV%, coefficient of variation in %; Max, maximum; Min, minimum; SNAC, sodium N-(8-[2-hydroxybenzoyl] amino) caprylate; SS, steady state; T2D, type 2 diabetes;  $t_{max}$ , time to maximum concentration.
